# 1 **Linking the International Wheat Genome Sequencing Consortium** 2 **bread wheat reference genome sequence to wheat genetic and** 3 **phenomic data**

4

5 Michael Alaux<sup>1\*</sup>, Jane Rogers<sup>2</sup>, Thomas Letellier<sup>1</sup>, Raphaël Flores<sup>1</sup>, Françoise Alfama<sup>1</sup>, Cyril  
6 Pommier<sup>1</sup>, Nacer Mohellibi<sup>1</sup>, Sophie Durand<sup>1</sup>, Erik Kimmel<sup>1</sup>, Célia Michotey<sup>1</sup>, Claire Guerche<sup>1</sup>,  
7 Mikaël Loaec<sup>1</sup>, Mathilde Lainé<sup>1</sup>, Delphine Steinbach<sup>1†</sup>, Frédéric Choulet<sup>3</sup>, Hélène Rimbart<sup>3</sup>,  
8 Philippe Leroy<sup>3</sup>, Nicolas Guilhot<sup>3</sup>, Jérôme Salse<sup>3</sup>, Catherine Feuillet<sup>3‡</sup>, International Wheat  
9 Genome Sequencing Consortium<sup>2</sup>, Etienne Paux<sup>3</sup>, Kellye Eversole<sup>2</sup>, Anne-Françoise Adam-  
10 Blondon<sup>1</sup>, Hadi Quesneville<sup>1</sup>

11

12 <sup>1</sup> URGI, INRA, Université Paris-Saclay, 78026, Versailles, France.

13 <sup>2</sup> International Wheat Genome Sequencing Consortium, 2841 NE Marywood Ct, Lee's  
14 Summit, MO 64086, USA.

15 <sup>3</sup> GDEC, INRA, Université Clermont Auvergne, 63000, Clermont-Ferrand, France.

16 † current address: GQE-Le Moulon UMR 320, INRA, Université Paris-Sud, Université Paris-  
17 Saclay, CNRS, AgroParisTech, Ferme du Moulon, 91190, Gif-sur-Yvette, France.

18 ‡ current address: Bayer CropScience, 3500 Paramount Pkwy., Morrisville, NC 27560, USA.

19 \*Corresponding author. E-mail:michael.alaux@inra.fr

20

21

## 22 **Keywords**

23 data integration - information system - big data - wheat genomics, genetics and phenomics

24

25

## 26 **Abstract**

27 The Wheat@URGI portal (<https://wheat-urgi.versailles.inra.fr>) has been developed to provide  
28 the international community of researchers and breeders with access to the bread wheat  
29 reference genome sequence produced by the International Wheat Genome Sequencing  
30 Consortium. Genome browsers, BLAST, and InterMine tools have been established for in  
31 depth exploration of the genome sequence together with additional linked datasets including  
32 physical maps, sequence variations, gene expression, and genetic and phenomic data from  
33 other international collaborative projects already stored in the GnpIS information system. The  
34 portal provides enhanced search and browser features that will facilitate the deployment of  
35 the latest genomics resources in wheat improvement.

36

37

## 38 **Background**

39 The International Wheat Genome Sequencing Consortium (IWGSC) [1] is an international  
40 collaborative group of growers, academic scientists, and public and private breeders that was  
41 established to generate a high quality reference genome sequence of the hexaploid bread  
42 wheat, and to provide breeders with state-of-the-art tools for wheat improvement. The vision  
43 of the consortium is that the high quality, annotated ordered genome sequence integrated  
44 with physical maps will serve as a foundation for the accelerated development of improved  
45 varieties and will empower all aspects of basic and applied wheat science to address the  
46 important challenge of food security. A first analysis of the reference sequence produced by  
47 the consortium (IWGSC RefSeq v1.0) was recently published [2].

48 To ensure that wheat breeding and research programs can make the most of this extensive  
49 genomic resource, the IWGSC endorsed the establishment of a data repository at URGI (Unité  
50 de Recherche Génomique Info / research unit in genomics and bioinformatics) from INRA  
51 (Institut National de la Recherche Agronomique / French national institute for agricultural  
52 research) to develop databases and browsers with relevant links to public data available  
53 worldwide. The IWGSC data repository is thus hosted by URGI to support public and private  
54 parties in data management as well as analysis and usage of the sequence data. Wheat  
55 functional genomics (expression, methylation, etc.), genetic, and phenomic data has increased  
56 concurrently, requiring the development of additional tools and resources to integrate  
57 different data for biologists and breeders. To manage this escalation of data, URGI have built  
58 this data repository for the wheat community with the following specific aims: (i) store  
59 resources for which no public archive exists (e.g. physical maps, phenotype information); (ii)  
60 enable pre-publication access to specific datasets (e.g. sequence assemblies and annotations,  
61 physical maps, markers); and (iii) rapid release of integrated resources upon publication. The  
62 repository has been designed in accordance with the “FAIR” principles [3] to ensure that the  
63 data are Findable, Accessible, Interoperable and Reusable. To address the challenge of  
64 integrating diverse data types from multiple sources, URGI employs solutions that provide  
65 enhanced features for data exploration, mining and visualisation using the GnpIS information  
66 system [4] combined with a high level of data interoperability.

67 Here we describe the data and tools currently available through the Wheat@URGI portal [5],  
68 the primary resource for the reference sequence of the bread wheat genome (IWGSC RefSeq  
69 v1.0) and other IWGSC wheat genomic data. The links to functional genomics, genetic and  
70 phenomic data from many other large wheat projects are also described.

71

72

## 73 **A large wealth of data is available throughout the Wheat@URGI** 74 **portal**

75 The data hosted by the Wheat@URGI portal are available through flat files stored in the  
76 IWGSC data repository and through the GnpIS information system [4]. GnpIS encompasses a  
77 set of integrated databases to manage genomic data using well-known tools such as BLAST,  
78 JBrowse, GBrowse and InterMine, and an in-house database called GnpIS-coreDB developed  
79 by URGI to manage genetic and phenomic data.

80

### 81 **IWGSC data**

82 Through its concerted efforts to achieve a high quality, functionally annotated reference  
83 wheat genome sequence, the IWGSC has developed a variety of resources for the bread wheat  
84 (*Triticum aestivum L.*) accession Chinese Spring. The IWGSC data hosted in the Wheat@URGI  
85 portal within the IWGSC data repository are shown in Table 1. They fall into four broad  
86 categories: (i) physical maps, (ii) sequence assemblies and annotations, (iii) gene expression,  
87 and (iv) variation data.

88 *Physical maps:* physical maps assembled by IWGSC scientists for the 21 bread wheat  
89 chromosomes, based on high information content fluorescence fingerprinting (HICF) [6] or  
90 whole genome profiling (WGP<sup>TM</sup>) [7] of flow-sorted chromosome or chromosome-arm specific  
91 BAC libraries, are stored and displayed. The positions of individual BAC clones, markers, and  
92 deletion bins are mapped onto physical contigs. The database maintains all released versions  
93 of each physical map with the software used to produce the BAC clone assemblies (FPC [8] or  
94 LTC [9]), information from the group that produced the map and a link to order the BAC clones  
95 from the French plant genomic resource centre [10].

96 *Sequence assemblies and annotations:* the IWGSC wheat genome sequence assemblies  
97 available for download, BLAST [11], and display in genome browsers include the draft survey  
98 sequence assemblies released in 2014 (IWGSC Chromosome Survey Sequence (CSS) v1) and  
99 two improved versions (CSS v2 and v3) [12], and the chromosome 3B reference sequence (the  
100 first reference quality chromosome sequence obtained by the consortium) [13]. Associated  
101 with these assemblies are the virtual gene order map generated for the CSS (Genome Zipper),  
102 the POPSEQ data used to order sequence contigs on chromosomes [14] and mapped marker  
103 sets. The reference sequence of the bread wheat genome (IWGSC RefSeq v1.0, 14.5 Gb  
104 assembly with super scaffold N50 of 22.8Mb) was obtained by integrating whole genome  
105 shotgun Illumina short reads assembled with NRGene's DeNovoMAGIC™ software with the  
106 wealth of IWGSC map and sequence resources [2]. The IWGSC RefSeq v1.0 is available for  
107 download, BLAST, and browser display. Users can access the whole genome, pseudomolecules  
108 of individual chromosomes or chromosome arms, and scaffolds with the structural and  
109 functional annotation of genes, transposable elements, and non-coding RNAs generated by  
110 the IWGSC. In addition, mapped markers as well as alignments of nucleic acid and protein  
111 evidence supporting the annotation are available. Updated versions of the annotation for  
112 genes belonging to specific gene families or regions of specific chromosomes that have been  
113 manually annotated (ca. 3685 genes) can be found in the IWGSC RefSeq v1.1 annotation.

114 In addition to the bread wheat sequence, the IWGSC also assembled seven diploid and  
115 tetraploid wheat related species: *Triticum durum* cv. Cappelli, *Triticum durum* cv. Strongfield,  
116 *Triticum durum* cv Svevo, *Triticum monococcum*, *Triticum urartu*, *Aegilops speltoides*, *Aegilops*  
117 *sharonensis* [12]. Download and BLAST is available for these data.

118 *Expression data:* RNA-Seq expression data are available as reads counts and transcripts per  
119 kilobase million (TPM) for the IWGSC RefSeq v1.1 annotation. It is a transcriptome atlas

120 developed from 850 RNA-Seq datasets representing a diverse range of tissues, development  
 121 stages and environmental condition [15].

122 *Variation data*: These data consists of downloadable VCF files from genotyping by sequencing  
 123 and whole exome capture experiments of 62 diverse wheat lines [16] and of the IWGSC  
 124 3,289,847 inter-varietal SNPs [17].

125 **Table 1**

126 IWGSC data summary in open access hosted in the IWGSC Data Repository of the  
 127 Wheat@URGI portal in March 2018.

| Data                                | Details                                                                                                                                                         | Tools                       | Contacts                                                        |
|-------------------------------------|-----------------------------------------------------------------------------------------------------------------------------------------------------------------|-----------------------------|-----------------------------------------------------------------|
| IWGSC RefSeq v1.0 assembly          | scaffolds, superscaffolds, pseudomolecules                                                                                                                      | Download, BLAST and browser | IWGSC                                                           |
| IWGSC RefSeq v1.0 annotation        | genes, transposable elements, ncRNAs, markers, functional annotation, RNA-seq                                                                                   | Download and browser        | IWGSC                                                           |
| IWGSC WGA v0.4                      | scaffolds, superscaffolds, pseudomolecules                                                                                                                      | Download and BLAST          | IWGSC                                                           |
| IWGSC Survey sequence v2 assembly   | contigs, gene models, Genome Zipper, POPSEQ                                                                                                                     | Download and BLAST          | IWGSC, Mihaela Martis, Manuel Spannagl, Klaus Mayer, Nils Stein |
| IWGSC Survey sequence v2 annotation | genes, markers, physical contigs                                                                                                                                | Browser                     | IWGSC, Curtis Pozniak, Eduard Akhunov                           |
| IWGSC Survey sequence v3 assembly   | scaffolds                                                                                                                                                       | Download and browser        | Andy Sharpe, David Konkin, Curtis Pozniak                       |
| IWGSC SNPs                          | intervarietal SNPs                                                                                                                                              | Download                    | Etienne Paux                                                    |
| 3B reference sequence assembly      | contig, scaffolds, pseudomolecule                                                                                                                               | Download and BLAST          | Frédéric Choulet, Etienne Paux                                  |
| 3B reference sequence annotation    | genes, transposable elements, RNAs, markers                                                                                                                     | Browser                     | Frédéric Choulet, Etienne Paux                                  |
| Other wheat species WGS assemblies  | Triticum durum cv. Cappelli, Triticum durum cv. Strongfield, Triticum monococcum, Aegilops speltoides, Aegilops Sharonensis, Triticum urartu, Aegilops tauschii | Download and BLAST          | Jon Wright, Mario Caccamo                                       |
| Transcriptome                       | Deep transcriptome sequencing                                                                                                                                   | Download                    | Lise Pingault, Etienne Paux                                     |
|                                     | Triticum urartu and Triticum turgidum (Graingenes)                                                                                                              | Download                    | Jorge Dubcovsky                                                 |
| Variations                          | GBS and WEC                                                                                                                                                     | Download                    | Eduard Akhunov                                                  |
| Physical maps                       | 1AS v1 and v2                                                                                                                                                   | Download and browser        | James Breen, Thomas Wicker, Beat Keller                         |
|                                     | 1AL v1 and v2                                                                                                                                                   | Download and browser        | Stuart Lucas, Hikmet Budak                                      |
|                                     | 2AS                                                                                                                                                             | Download and browser        | Kuldeep Singh                                                   |
|                                     | 2AL                                                                                                                                                             | Download and browser        | Kuldeep Singh                                                   |

|                       |                      |                                                |
|-----------------------|----------------------|------------------------------------------------|
| 3AS v1                | Download and browser | Sunish Sehgal, Bikram Gill                     |
| 3AS v2                | Download and browser | Sunish Sehgal, Bikram Gill                     |
| 3AL                   | Download and browser | Vijay Kumar Tiwari                             |
| 4AS                   | Download and browser | Miroslav Valarik, Jaroslav Dolezel             |
| 4AL v1 and v2         | Download and browser | Miroslav Valarik, Jaroslav Dolezel             |
| 5AS                   | Download and browser | Simone Scalabrin                               |
| 5AL                   | Download and browser | Simone Scalabrin                               |
| 6AS                   | Download and browser | Naser Poursarebani                             |
| 6AL                   | Download and browser | Naser Poursarebani                             |
| 7AS                   | Download and browser | Gabriel Keeble-Gagnere                         |
| 7AL                   | Download and browser | Gabriel Keeble-Gagnere                         |
| 1BS v1, v2, v3 and v5 | Download and browser | Dina Raats, Zeev Frenkel, Abraham Korol        |
| 1BL v1 and v2         | Download and browser | Etienne Paux                                   |
| 2BS                   | Download and browser | John Jacobs                                    |
| 2BL                   | Download and browser | John Jacobs                                    |
| 3B                    | Download and browser | Etienne Paux                                   |
| 4BS                   | Download and browser | John Jacobs                                    |
| 4BL                   | Download and browser | John Jacobs                                    |
| 5BS                   | Download and browser | Elena Salina                                   |
| 5BL                   | Download and browser | John Jacobs                                    |
| 6BS v1 and v2         | Download and browser | Fuminori Kobayashi, Hirokazu Handa             |
| 6BL v1 and v2         | Download and browser | Fuminori Kobayashi, Hirokazu Handa             |
| 7BS                   | Download and browser | Tatiana Belova, Odd-Arne Olsen                 |
| 7BL                   | Download and browser | Tatiana Belova, Odd-Arne Olsen                 |
| 1D                    | Download and browser | Bikram Gill, Sunish Sehgal, Vijay Kumar Tiwari |
| 2DS                   | Download and browser | John Jacobs                                    |
| 2DL                   | Download and browser | John Jacobs                                    |
| 3DS v1 and v2         | Download and browser | Jan Bartos, Jaroslav Dolezel                   |
| 3DL                   | Download and browser | Jon Wright, Mario Caccamo, Mike Bevan          |
| 4D                    | Download and browser | Bikram Gill, Sunish Sehgal, Vijay Kumar Tiwari |
| 5DS                   | Download and browser | Hikmet Budak, Bala Ani Akpinar                 |
| 5DL                   | Download and browser | John Jacobs                                    |
| 6D                    | Download and browser | Bikram Gill, Sunish Sehgal, Vijay Kumar Tiwari |
| 7DS                   | Download and browser | Hana Simkova, Jaroslav Dolezel                 |
| 7DL                   | Download and browser | Song Weining, Wang Le                          |

128 Enquiries about these data should be addressed to [communications@wheatgenome.org](mailto:communications@wheatgenome.org) and  
 129 [urgi-contact@inra.fr](mailto:urgi-contact@inra.fr).

130

131

132 **Wheat gene pool**

133 As well as IWGSC resources, URGI also hosts other open access wheat sequence data to  
134 facilitate research into the wheat gene pool. Sequence assemblies available for download and  
135 BLAST include the bread wheat whole genome sequence assembly *Triticum aestivum* TGACv1  
136 [18] and the diploid progenitor of *Aegilops tauschii* [19].

137

138 **Genetic and phenomic data**

139 In addition to sequence data, the Wheat@URGI portal hosts, within GnpIS-coreDB, several  
140 sets of genetic and phenomic wheat data [20] that have been produced from French,  
141 European, and international projects since 2000 [21]. A significant amount of these data is  
142 available without restriction. However, access to restricted data can be obtained through a  
143 material transfer or intellectual property agreement. Table 2 presents the types and number  
144 of genetic and phenomic data hosted in the GnpIS-coreDB database.

145 Genetic information corresponds to genetically mapped markers, quantitative trait loci (QTLs),  
146 genetic resources (germplasms), and genetic studies (genome wide association studies -  
147 GWAS). Genomic information consists of variation from SNP discovery experiments,  
148 genotyping, comparative genomics (synteny) and expression data (microarray, RNA-Seq).  
149 Phenomic data are available as whole trials including phenotypic and environmental  
150 observations recorded using ontologies controlled variables with MIAPPE [22] compliant  
151 metadata.

152 Germplasm data were mainly provided by the French small grain cereals genebank maintained  
153 by INRA at Clermont-Ferrand [23] but also by partners of several EU projects. They were linked  
154 together with related genotyping or phenotyping characterization data. Generally, genetic  
155 and phenomic data have been produced by INRA and its partners in large collaborative  
156 projects.



157 **Table 2**

158 Genetic and phenomic wheat data summary hosted in the GnpIS-coreDB database of the  
159 Wheat@URGI portal in March 2018.

| Data type                    | Object             | #Total     | #Open access | #Restricted access to projects |
|------------------------------|--------------------|------------|--------------|--------------------------------|
| Genetic Resources            | Taxon              | 56         | 56           | 0                              |
|                              | Accession          | 12839      | 10016        | 2823                           |
| Genetic Maps                 | Map                | 30         | 29           | 1                              |
|                              | Marker             | 704822     | 34164        | 670658                         |
|                              | QTL                | 749        | 465          | 284                            |
| SNP discovery                | Sequence Variation | 4189312581 | 90           | 4189312491                     |
|                              | SNP, indel         | 724132     | 95           | 724037                         |
| Genotyping (high throughput) | Experiment         | 23         | 2            | 21                             |
|                              | Sample             | 8885       | 47           | 8872                           |
|                              | Marker             | 668540     | 0            | 668540                         |
| Phenotyping                  | Trial              | 850        | 821          | 29                             |
|                              | Plot               | 3660       | 2985         | 901                            |
|                              | Variable           | 282        | 89           | 195                            |
|                              | Observation        | 1171172    | 527981       | 643191                         |
| GWAS                         | Analysis           | 1555       | 43           | 1512                           |
|                              | Sample             | 2365       | 1839         | 526                            |
|                              | Variable           | 359        | 37           | 322                            |
|                              | Marker             | 123866     | 4109         | 119757                         |
|                              | Association        | 824217     | 48596        | 775621                         |

160 Questions about these data can be addressed to [urg-contact@inra.fr](mailto:urg-contact@inra.fr).

161

162

163 **Browsing and searching a large variety of integrated data**

164 Data can be easily accessed through the Wheat@URGI portal [5] using (i) tabs at the top of  
165 the pages allowing access in one click to the data, tools, and projects descriptions as well as  
166 the IWGSC data repository, (ii) direct links on the home page to the different data types (e.g.  
167 clicking on “Physical maps” opens the physical maps browser), and (iii) data discovery and  
168 InterMine [24] tools on the home page.

169 The IWGSC data repository [25] allows accessing consortium data by (i) clicking on a  
170 chromosome to open a pop-up menu with all related data (e.g. 3A, 3B, etc.), (ii) using the tabs

171 on the left to access the data by type (e.g. Assemblies, Annotations, etc.), or useful links to the  
172 news, the BLAST tool, the FAQ, the access status of the data (e.g. open access), etc.

173

#### 174 **Physical maps browser**

175 A GBrowse [26] displays the physical maps generated by the IWGSC members [27]. A clickable  
176 image on the top of the browser gives access to all versions of the physical map for each  
177 chromosome. The browser displays physical contigs, BACs, deletions bins, and markers. From  
178 the BACs track, it is possible to order BAC clones directly at the INRA French plant genomic  
179 resource centre [10]. From the BACs and markers tracks, one can go directly to the  
180 corresponding region in the IWGSC RefSeq v1.0 browser.

181

#### 182 **Genome browser and BLAST**

183 The IWGSC RefSeq v1.0 is displayed in a dedicated JBrowse [28], [29]. The “markers track”  
184 provides links to additional genetic information stored in GnpIS-coreDB which includes access  
185 to the position of the marker in cM on genetic maps and to the overlapping QTLs. The most  
186 popular tool of the IWGSC data repository is the BLAST search tool (476,000 BLAST searches  
187 launched in 2017). All of the wheat sequences available on the Wheat@URGI portal are  
188 indexed for BLAST search (see [30] for the complete list). A set of databanks can be selected:  
189 e.g. IWGSC RefSeq v1.0 and IWGSC CSS v3 for a given chromosome. The result is presented in  
190 a classical tabular format with (i) links to download the data (matching contigs and high scoring  
191 pairs - HSP), (ii) links on the genome browsers directly zooming in on the matching region and  
192 (iii) external links to EnsemblPlants [31].

193

#### 194 **Genetic and phenomic data in GnpIS-coreDB**

195 The IWGSC sequence data are linked to genetic and phenomic data within the GnpIS  
196 information system [4]. This integration is organized around key data, also called “pivot data”  
197 as they are pivotal objects which allow integration between data types. The key objects used  
198 to link genomic resources to genetic data are markers and QTLs. Markers are mapped on the  
199 genome sequences and provides information on neighbour genes and their function. They  
200 also have links to GnpIS-coreDB genetic maps, QTLs, genotyping and GWAS data. Additional  
201 information on the marker itself can be found regarding the marker type (e.g. SSR, DArT), the  
202 primers sequence for PCR amplification, and SNP details (including the flanking sequences)  
203 when relevant. QTLs link the genetic data to the phenomic data in GnpIS-coreDB and to  
204 synteny data displayed by the PlantSyntenyViewer tool [32], [33].

205 The accession (i.e. germplasm) and the variables (i.e. observed trait) described with dedicated  
206 ontologies are another important key data for genetic studies as they allow linking phenotype  
207 data to genetic associations or QTLs through traits and to genotype diversity data. The genetic  
208 resources stored in GnpIS-coreDB displays the unambiguous identification of the accession  
209 used (with digital object identifier - DOI) and a rich set of associated data following the MCPD  
210 (multi-crop passport descriptors, [34]) standard: a picture, synonyms, descriptors, geolocation  
211 of the sites (origin, collecting and evaluation), the collections or panels it belongs to, the  
212 holding stock centre with a link to order the accession when possible. The phenotype data  
213 includes traceability on trials with timing, like year and temporal series, location, and  
214 environment including soil and cultural practices. The phenotype and environment variables  
215 follow the crop ontologies format [35] that includes unique identifiers for each variable which  
216 are composed of a trait description (e.g. grain yield, plant height top, spike per area), a unit  
217 and a method. All these data are displayed in the GnpIS-coreDB web interface and can be  
218 downloaded in different file formats, all compliant with the MIAPPE standard [22].

219

220 **Mining and data discovery tools**

221 To complete this already rich integrated datasets, a gene centric data warehouse, the  
 222 WheatMine, has been set-up using the well-established InterMine tool [24]. The gene card  
 223 displays gene function, gene ontology terms, and overlapping genomic features. WheatMine  
 224 [36] provides access to IWGSC RefSeq v1.0 annotation data (genes, mRNA, polypeptides,  
 225 transposable elements), polymorphisms (markers) and, through pivotal objects, to genetic  
 226 data (QTL, metaQTL). It is also possible to navigate from a gene card to its position on the  
 227 wheat genome browser or to relevant marker details in GnpIS-coreDB.

228 Figure 1 presents the concept and the tools to navigate through the key data in GnpIS.

229 Figure 1

230 Conceptual view of wheat data links in GnpIS

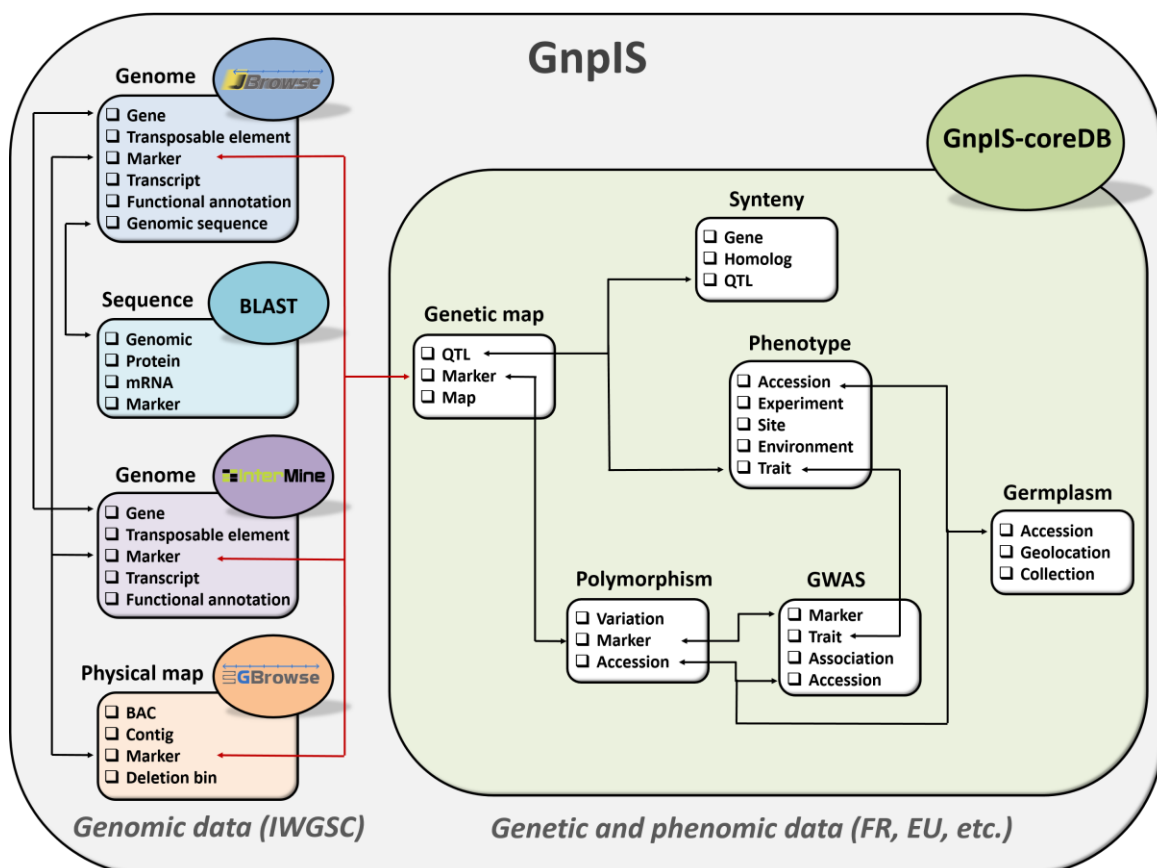

231

232

233 Finally, to facilitate data search and access to this wealth of data, we developed a data  
234 discovery tool, which, similar to a google search, allows the user to enter keywords or terms  
235 to find all the matching information in the various data warehouses. The results are presented  
236 in a table with details on the matches (database source, type, species, description) and a direct  
237 link to the feature (e.g. a gene in a browser, a marker page in GnpIS-coreDB, etc.).  
238 A practical use case describing how to use the Wheat@URGI portal to go from a gene  
239 sequence to find the genetic studies related is detailed in the Supplementary data.

240

241

## 242 **Conclusion and future directions**

243 The Wheat@URGI portal hosts and gives access to essential, high quality wheat data from the  
244 IWGSC, European, and international projects. Furthermore, its added value is that it integrates  
245 different data type altogether (genomics, genetics and phenomics) and provides dedicated  
246 tools to explore them.

247 As new wheat resources such as GWAS, genomic selection, and pan-genome data are  
248 generated in the frame of ongoing projects, GnpIS will allow their management and  
249 integration with other data already available in the information system, linking new upcoming  
250 data to this central IWGSC genomic resource.

251 At a wider scale, an expert working group (EWG) of the international Wheat Initiative build an  
252 international wheat information system, called WheatIS, with the aim of providing a single-  
253 access web-based system to all available wheat data resources and bioinformatics tools [37].

254 The Wheat@URGI portal is a major node of the WheatIS federation that expose genomic,  
255 genetic and phenomic integrated data to the community. The WheatIS data discovery tool  
256 allows a one-stop search in GnpIS [4] (including IWGSC browsers, InterMine and GnpIS-

257 coreDB; URGI), EnsemblPlants (EMBL-EBI) [31], CrowsNest [38] (PGSB), CR-EST [39], GBIS [40]  
258 and MetaCrop [41] (IPK), The Triticeae Toolbox (Triticeae CAP), CIMMYT DSpace and  
259 Dataverse (CIMMYT), Gramene [42] (CSH, OSU, EMBL-EBI), Cropnet (IPGPAS), WheatPan [43]  
260 (UWA) and GrainGenes [44] (USDA).

261 The Figure 2 presents the WheatIS ecosystem.

262 Figure 2

263 The Wheat@URGI portal node in the WheatIS ecosystem

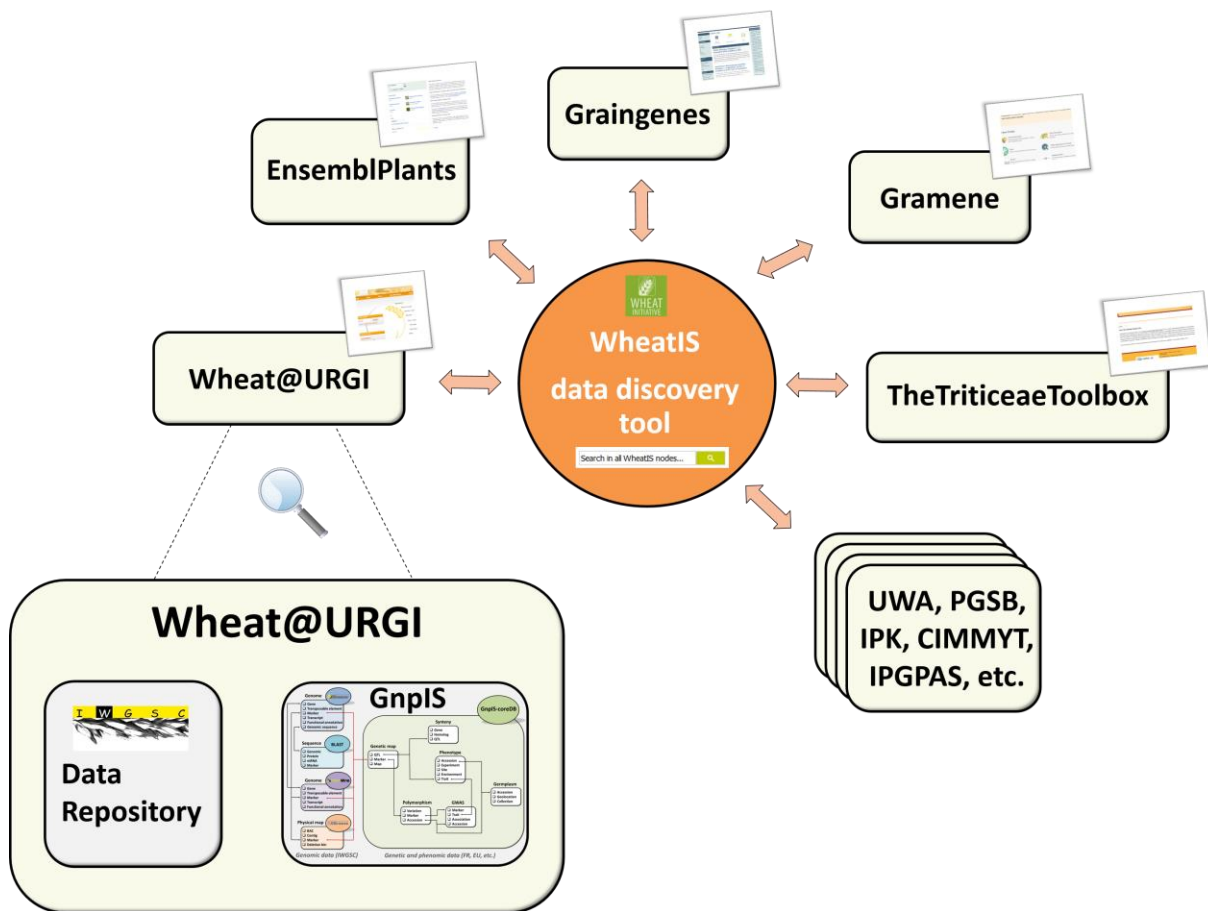

264

265

266 Data integration is fundamental for researchers and breeders that want to use genomic  
267 information to improve wheat varieties. However, the diversity of data type and the  
268 concomitant lack of data harmonisation and standards hamper cross-referencing and meta-  
269 analysis. A joint action between the WheatIS EWG and a group of linked data scientists created  
270 the Wheat Data Interoperability Working Group under the Research Data Alliance (RDA)

271 umbrella [45] to help tackle this difficult issue [46]. The Wheat@URGI portal continuously  
272 evolves its repository to follow the standard recommendations [47].

273

274

## 275 **Abbreviations**

276 **IWGSC:** international wheat genome sequencing consortium

277 **INRA:** institut national de la recherche agronomique / French national institute for agricultural  
278 research

279 **URGI:** unité de recherche génomique info / research unit in genomics and bioinformatics

280 **FAIR:** findable, accessible, interoperable, reusable

281 **BLAST:** basic local alignment search tool

282 **HICF:** high-information-content fingerprinting

283 **WGP<sup>TM</sup>:** whole genome profiling

284 **BAC:** bacterial artificial chromosome

285 **FPC:** fingerprinted contig

286 **LTC:** linear topological contig

287 **CSS:** chromosome survey sequence

288 **POPSEQ:** population sequencing

289 **RNA:** ribonucleic acid

290 **TPM:** transcripts per kilobase million

291 **VCF:** variant call format

292 **SSR:** simple sequence repeats

293 **SNP:** single nucleotide polymorphism

294 **DArT:** diversity arrays technology

- 295 **QTL:** quantitative trait loci
- 296 **GWAS:** genome-wide association study
- 297 **cM:** centimorgan
- 298 **HSP:** high scoring pairs
- 299 **PCR:** polymerase chain reaction
- 300 **DOI:** digital object identifier
- 301 **MCPD:** multi-crop passport descriptors
- 302 **MIAPPE:** minimum information about a plant phenotyping experiment
- 303 **EWG:** expert working group
- 304 **EMBL-EBI:** European bioinformatics institute
- 305 **PGSB:** plant genome and systems biology group
- 306 **IPK:** Leibniz institute of plant genetics and crop plant research
- 307 **CIMMYT:** international maize and wheat improvement center
- 308 **CSH:** Cold Spring Harbor laboratory
- 309 **OSU:** Ohio State University
- 310 **IPGPAS:** institute of plant genetics of the Polish academy of science
- 311 **UWA:** University of Western Australia
- 312 **USDA:** U.S. department of agriculture
- 313 **EWG:** expert working group
- 314 **RDA:** research data alliance
- 315
- 316
- 317 **Declarations**
- 318 **Ethics approval and consent to participate**



319 Not applicable.

320

321 **Consent for publication**

322 Not applicable.

323

324 **Availability of data and materials**

325 The open access data (including all the IWGSC data) are available through the Wheat@URGI  
326 portal: <https://wheat-urgi.versailles.inra.fr>.

327

328 **Competing interest**

329 The authors declare that they have no competing interests.

330

331 **Funding**

332 The development of the information system and the integration of wheat data was supported  
333 by INRA and several projects: BreedWheat (ANR-10-BTBR-03, France Agrimer, FSOV), Whealbi  
334 (EU FP7-613556), TriticeaeGenome (EU FP7-KBBE-212019), 3BSEQ (ANR-09-GENM-025,  
335 FranceAgrimer), TransPLANT (EU FP7-283496).

336

337 **Authors' contributions**

338 MA, JR, TL, FA, KE designed, developed and filled the IWGSC data repository.

339 MA, TL, RF, FA, CP, NM, SD, EK, CM, CG, MLo, MLa, DS, AFAB, HQ designed, developed and  
340 filled the GnpIS information system.

341 FC, HR, PL, NG, JS, CF, IWGSC, EP generated, submitted the data and give feedback on the  
342 tools.

343 MA, JR, EP, KE, AFAB, HQ draft the manuscript.

344 All authors read and approved the final manuscript.

345

## 346 **Acknowledgements**

347 The authors would like to thank for their help or advices at various stages of the project, the  
348 following people from INRA-URGI: Véronique Jamilloux, Joëlle Amselem, Dorothée Charruau,  
349 Guillaume Cornut, Laura Burlot, Florian Philippe, Nicolas Francillonne, Loïc Couderc, Daphné  
350 Verdelet, Baptiste Brault, Kirsley Chennen; from INRA-GDEC: Jacques Le Gouis, Gilles Charmet,  
351 François Balfourier, Pierre Sourdille, Catherine Ravel, François-Xavier Oury, Audrey Didier;  
352 from INRA-DIST: Esther Dzale, Sophie Aubin, Odile Hologne; and from INRA-Agronomie:  
353 Arnaud Gauffreteau.

354 Thanks to Isabelle Caugant (IWGSC), Hélène Lucas (Wheat Initiative), the International Wheat  
355 Genome Sequencing Consortium and its sponsors, the WheatIS expert working group, the  
356 URGI platform, and all the data submitters.

357

358

## 359 **References**

360 1. IWGSC website. <http://www.wheatgenome.org/>. Accessed 10 April 2018.

361 2. IWGSC, 2018, under review.

362 3. Wilkinson MD, Dumontier M, Aalbersberg IJJ, Appleton G, Axton M, Baak A, et al. The FAIR Guiding  
363 Principles for scientific data management and stewardship. *Sci Data*. 2016;3:160018.

364 4. Steinbach D, Alaux M, Amselem J, Choisne N, Durand S, Flores R, et al. GnpIS: an information system to  
365 integrate genetic and genomic data from plants and fungi. *Database J Biol Databases Curation*.  
366 2013;2013:bat058.

367 5. Wheat@URGI portal. <https://wheat-urgi.versailles.inra.fr>. Accessed 10 April 2018.

368 6. Nelson WM, Bharti AK, Butler E, Wei F, Fuks G, Kim H, et al. Whole-Genome Validation of High-  
369 Information-Content Fingerprinting. *Plant Physiol*. 2005;139:27–38.

370 7. Philippe R, Choulet F, Paux E, van Oeveren J, Tang J, Wittenberg AH, et al. Whole Genome Profiling  
371 provides a robust framework for physical mapping and sequencing in the highly complex and repetitive wheat  
372 genome. *BMC Genomics*. 2012;13:47.

373 8. Soderlund C, Humphray S, Dunham A, French L. Contigs built with fingerprints, markers, and FPC V4.7.  
374 *Genome Res*. 2000;10:1772–87.

- 375 9. Frenkel Z, Paux E, Mester D, Feuillet C, Korol A. LTC: a novel algorithm to improve the efficiency of contig  
376 assembly for physical mapping in complex genomes. *BMC Bioinformatics*. 2010;11:584.
- 377 10. French plant genomic resource centre. <https://cnrgv.toulouse.inra.fr/en>. Accessed 10 April 2018.
- 378 11. Altschul SF, Gish W, Miller W, Myers EW, Lipman DJ. Basic local alignment search tool. *J Mol Biol*.  
379 1990;215:403–10.
- 380 12. International Wheat Genome Sequencing Consortium (IWGSC). A chromosome-based draft sequence of the  
381 hexaploid bread wheat (*Triticum aestivum*) genome. *Science*. 2014;345:1251788.
- 382 13. Choulet F, Alberti A, Theil S, Glover N, Barbe V, Daron J, et al. Structural and functional partitioning of  
383 bread wheat chromosome 3B. *Science*. 2014;345:1249721.
- 384 14. Mascher M, Muehlbauer GJ, Rokhsar DS, Chapman J, Schmutz J, Barry K, et al. Anchoring and ordering  
385 NGS contig assemblies by population sequencing (POPSEQ). *Plant J Cell Mol Biol*. 2013;76:718–27.
- 386 15. Ramirez-Gonzalez et al., 2018, submitted.
- 387 16. Jordan KW, Wang S, Lun Y, Gardiner L-J, MacLachlan R, Hucl P, et al. A haplotype map of allohexaploid  
388 wheat reveals distinct patterns of selection on homoeologous genomes. *Genome Biol*. 2015;16:48.
- 389 17. Rimbart H, Darrier B, Navarro J, Kitt J, Choulet F, Leveugle M, et al. High throughput SNP discovery and  
390 genotyping in hexaploid wheat. *PloS One*. 2018;13:e0186329.
- 391 18. Clavijo BJ, Venturini L, Schudoma C, Accinelli GG, Kaithakottil G, Wright J, et al. An improved assembly  
392 and annotation of the allohexaploid wheat genome identifies complete families of agronomic genes and provides  
393 genomic evidence for chromosomal translocations. *Genome Res*. 2017;
- 394 19. Luo M-C, Gu YQ, You FM, Deal KR, Ma Y, Hu Y, et al. A 4-gigabase physical map unlocks the structure  
395 and evolution of the complex genome of *Aegilops tauschii*, the wheat D-genome progenitor. *Proc Natl Acad Sci*  
396 *U S A*. 2013;110:7940–5.
- 397 20. GnpIS wheat data. <https://wheat-urgi.versailles.inra.fr/Data>. Accessed 10 April 2018.
- 398 21. Samson D, Legeai F, Karsenty E, Reboux S, Veyrieras J-B, Just J, et al. GéoPlante-Info (GPI): a collection  
399 of databases and bioinformatics resources for plant genomics. *Nucleic Acids Res*. 2003;31:179–82.
- 400 22. Ćwiek-Kupczyńska H, Altmann T, Arend D, Arnaud E, Chen D, Cornut G, et al. Measures for  
401 interoperability of phenotypic data: minimum information requirements and formatting. *Plant Methods*.  
402 2016;12:44.
- 403 23. French small grain cereals genebank.  
404 [https://www6.clermont.inra.fr/umr1095\\_eng/Teams/Research/Biological-Resources-Centre](https://www6.clermont.inra.fr/umr1095_eng/Teams/Research/Biological-Resources-Centre). Accessed 10 April  
405 2018.
- 406 24. Kalderimis A, Lyne R, Butano D, Contrino S, Lyne M, Heimbach J, et al. InterMine: extensive web services  
407 for modern biology. *Nucleic Acids Res*. 2014;42:W468-472.
- 408 25. IWGSC data repository. <https://wheat-urgi.versailles.inra.fr/Seq-Repository>. Accessed 10 April 2018.
- 409 26. Stein LD, Mungall C, Shu S, Caudy M, Mangone M, Day A, et al. The generic genome browser: a building  
410 block for a model organism system database. *Genome Res*. 2002;12:1599–610.
- 411 27. GnpIS: Physical map browser. [https://urgi.versailles.inra.fr/gb2/gbrowse/wheat\\_phys\\_pub](https://urgi.versailles.inra.fr/gb2/gbrowse/wheat_phys_pub). Accessed 10  
412 April 2018.
- 413 28. Skinner ME, Uzilov AV, Stein LD, Mungall CJ, Holmes IH. JBrowse: a next-generation genome browser.  
414 *Genome Res*. 2009;19:1630–8.

- 415 29. GnpIS: IWGSC RefSeq v1.0 browser.  
416 [https://urgi.versailles.inra.fr/jbrowseiwgsc/gmod\\_jbrowse/?data=myData%2FIWGSC\\_RefSeq\\_v1.0](https://urgi.versailles.inra.fr/jbrowseiwgsc/gmod_jbrowse/?data=myData%2FIWGSC_RefSeq_v1.0). Accessed  
417 10 April 2018.
- 418 30. GnpIS: IWGSC BLAST tool. [https://urgi.versailles.inra.fr/blast\\_iwgsc/blast.php](https://urgi.versailles.inra.fr/blast_iwgsc/blast.php). Accessed 10 April 2018.
- 419 31. Bolser DM, Staines DM, Perry E, Kersey PJ. Ensembl Plants: Integrating Tools for Visualizing, Mining, and  
420 Analyzing Plant Genomic Data. *Methods Mol Biol Clifton NJ*. 2017;1533:1–31.
- 421 32. GnpIS PlantSyntenyViewer. <https://urgi.versailles.inra.fr/synteny/synteny/viewer.do#form/datasetId=6>.  
422 Accessed 10 April 2018.
- 423 33. Pont C, Murat F, Guizard S, Flores R, Foucrier S, Bidet Y, et al. Wheat syntenome unveils new evidences of  
424 contrasted evolutionary plasticity between paleo- and neoduplicated subgenomes. *Plant J Cell Mol Biol*.  
425 2013;76:1030–44.
- 426 34. Multi-Crop Passport Descriptors V.2.1. [https://www.bioversityinternational.org/e-  
427 library/publications/detail/faobioversity-multi-crop-passport-descriptors-v21-mcpd-v21/](https://www.bioversityinternational.org/e-library/publications/detail/faobioversity-multi-crop-passport-descriptors-v21-mcpd-v21/). Accessed 10 April  
428 2018.
- 429 35. Shrestha R, Matteis L, Skofic M, Portugal A, McLaren G, Hyman G, et al. Bridging the phenotypic and  
430 genetic data useful for integrated breeding through a data annotation using the Crop Ontology developed by the  
431 crop communities of practice. *Front Physiol*. 2012;3:326.
- 432 36. GnpIS: WheatMine tool. <https://urgi.versailles.inra.fr/WheatMine>. Accessed 10 April 2018.
- 433 37. WheaIS. <http://www.wheatis.org/>. Accessed 10 April 2018.
- 434 38. Spannagl M, Nussbaumer T, Bader KC, Martis MM, Seidel M, Kugler KG, et al. PGSB PlantsDB: updates  
435 to the database framework for comparative plant genome research. *Nucleic Acids Res*. 2016;44:D1141–7.
- 436 39. Künne C, Lange M, Funke T, Miede H, Thiel T, Grosse I, et al. CR-EST: a resource for crop ESTs. *Nucleic  
437 Acids Res*. 2005;33:D619–21.
- 438 40. Oppermann M, Weise S, Dittmann C, Knüpffer H. GBIS: the information system of the German Genebank.  
439 *Database J Biol Databases Curation [Internet]*. 2015 [cited 2017 Sep 18];2015. Available from:  
440 <http://www.ncbi.nlm.nih.gov/pmc/articles/PMC4423411/>
- 441 41. Schreiber F, Colmsee C, Czuderna T, Grafarend-Belau E, Hartmann A, Junker A, et al. MetaCrop 2.0:  
442 managing and exploring information about crop plant metabolism. *Nucleic Acids Res*. 2012;40:D1173–7.
- 443 42. Tello-Ruiz MK, Stein J, Wei S, Preece J, Olson A, Naithani S, et al. Gramene 2016: comparative plant  
444 genomics and pathway resources. *Nucleic Acids Res*. 2016;44:D1133–1140.
- 445 43. Montenegro JD, Golicz AA, Bayer PE, Hurgobin B, Lee H, Chan C-KK, et al. The pangenome of hexaploid  
446 bread wheat. *Plant J Cell Mol Biol*. 2017;90:1007–13.
- 447 44. Carollo V, Matthews DE, Lazo GR, Blake TK, Hummel DD, Lui N, et al. GrainGenes 2.0. An Improved  
448 Resource for the Small-Grains Community. *Plant Physiol*. 2005;139:643–51.
- 449 45. Wheat Data Interoperability Working Group of the Research Data Alliance. [https://rd-  
450 alliance.org/groups/wheat-data-interoperability-wg.html](https://rd-alliance.org/groups/wheat-data-interoperability-wg.html). Accessed 10 April 2018.
- 451 46. Dzale Yeumo E, Alaux M, Arnaud E, Aubin S, Baumann U, Buche P, et al. Developing data interoperability  
452 using standards: A wheat community use case. *F1000Research*. 2017;6:1843.
- 453 47. Wheat Data Interoperability Working Group guidelines. <https://ist.blogs.inra.fr/wdi/>. Accessed 10 April  
454 2018.
- 455 48. Deng W, Nickle DC, Learn GH, Maust B, Mullins JI. ViroBLAST: a stand-alone BLAST web server for  
456 flexible queries of multiple databases and user's datasets. *Bioinforma Oxf Engl*. 2007;23:2334–6.

## 457 **Supplementary data**

### 458 **Software technologies**

459 The Wheat@URGI portal website is based on eZ Publish v4 open source content management  
460 system (<https://ez.no/>) using the PHP language and a MySQL database  
461 (<https://www.mysql.com/>).

462 The genome browsers are based on the GMOD ([http://gmod.org/wiki/Main\\_Page](http://gmod.org/wiki/Main_Page)) GBrowse  
463 v2.33 [26] and JBrowse v1.11.5 [28] built with JavaScript and HTML5. We customized GBrowse  
464 to display the physical map data. The gff3 file is generated from the .fpc file obtained by the  
465 data producer using the FPC [8] or the LTC [9] tools.

466 The stand-alone BLAST web interface implemented at URGI is based on ViroBLAST [48],  
467 customized to obtain a user-friendly grouping of searched databanks and visualization of the  
468 results. A robust file download system was also developed using a home-made php script to  
469 handle big data volume.

470 GnpIS-coreDB is a URGI development using state of the art technologies: Java EE framework  
471 (<http://www.oracle.com/technetwork/java/javaee/overview/index.html>), GWT (Google Web  
472 Toolkit, <http://www.gwtproject.org/>), Spring boot v1.4 ([https://projects.spring.io/spring-](https://projects.spring.io/spring-boot/)  
473 [boot/](https://projects.spring.io/spring-boot/)), PostgreSQL relational database v9.6 (<https://www.postgresql.org/>) and Elasticsearch  
474 NoSQL database v2.3.3 (<https://www.elastic.co/>). To set-up a GnpIS-coreDB dedicated to the  
475 wheat community, a filter allowing to display only the wheat data (*Triticum*, *Aegilops*) and  
476 barley data (*Hordeum*) was developed. This filter relies on a variable-length multidimensional  
477 arrays field in the PostgreSQL database. It is completely transparent to the user and allows  
478 him to navigate in GnpIS-coreDB through wheat data only. New versions of the GnpIS-coreDB  
479 software are deposited in the APP, the European body for protecting authors and publishers  
480 of digital works (<http://www.app.asso.fr/en/welcome.html>).

481 WheatMine uses InterMine [24] v1.8.3 which provides a fast, flexible and user friendly access  
482 to integrated data by multiple ways: a browser, a query builder and a region search tool. Users  
483 can filter their favorite features, save their own queries, and export results in many different  
484 formats (GFF3, BED or XML). An On-line documentation and pre-computed queries are also  
485 available.

486 The data discovery tool relies on the Solr full-text indexing technology v6.6.2  
487 (<http://lucene.apache.org/solr/>). We used a restriction on the wheat and barley species to  
488 search only the corresponding data in the indexed databases. The tool was packaged and is  
489 downloadable (<https://wheat-urgi.versailles.inra.fr/Projects/Wheat-Information-System/SolR-tool-package>).  
490

491

## 492 Usage Statistics

493 Table S1. Usage statistics of genomics data in the Wheat@URGI portal (all numbers exclude  
494 web-robots and internal IP).

| Number of                                       | 2012  | 2013  | 2014  | 2015  | 2016   | 2017   |
|-------------------------------------------------|-------|-------|-------|-------|--------|--------|
| Visits on the IWGSC Sequence Repository website | N/A   | 11440 | 20754 | 27070 | 20841  | 28151  |
| Downloads of wheat sequence data                | 2253  | 4413  | 17783 | 19307 | 18724  | 22935  |
| Visits on the wheat browsers                    | 5869  | 9370  | 9130  | 22989 | 22373  | 18262  |
| Number of BLAST searches on wheat sequences     | 14100 | 60400 | 86000 | 92446 | 195763 | 476595 |
| Number of WheatIS data discovery tool searches  | N/A   | N/A   | N/A   | N/A   | 13010  | 26480  |

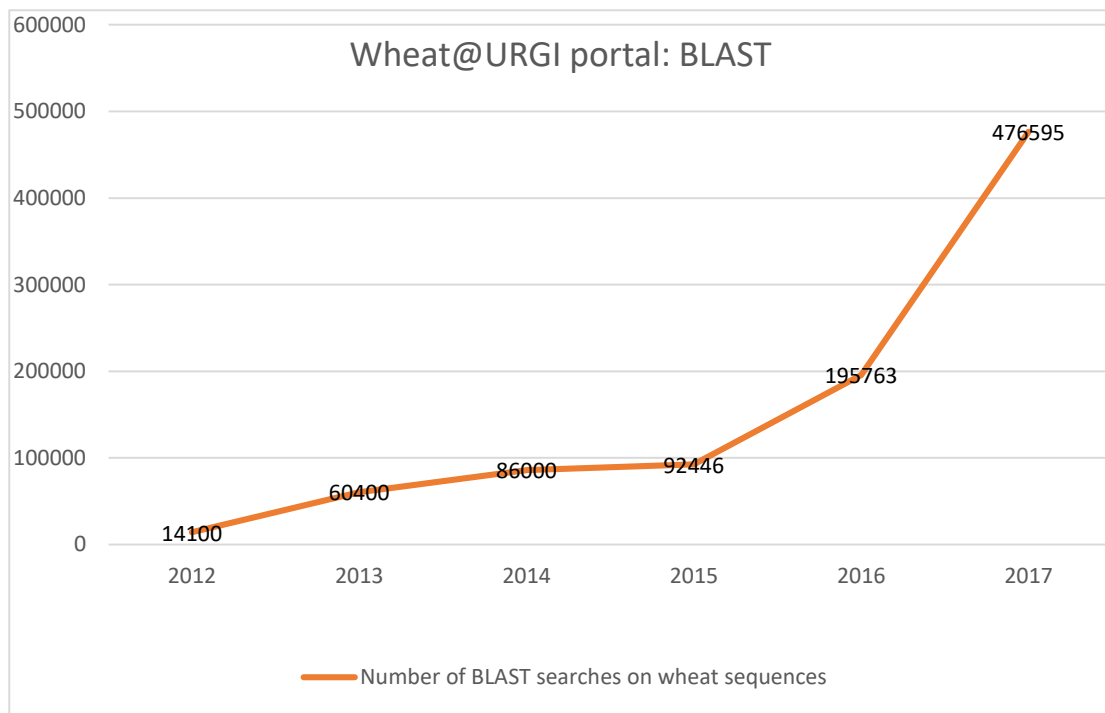

495

#### 496 **Use case example**

497 A researcher in genomics works on his wheat favorite gene. He wants to explore all the  
498 genomic data in the vicinity of this gene and find out if there are genetic studies pointing to  
499 the genomic regions where the gene is located. He searches the gene name (e.g.  
500 TraesCS5A01G033100) in the data discovery tool (<https://wheat-urgi.versailles.inra.fr>, Fig  
501 S1.1A) or BLAST the sequence of the gene against the IWGSC RefSeq v1.0  
502 ([https://urgi.versailles.inra.fr/blast\\_iwgsc/](https://urgi.versailles.inra.fr/blast_iwgsc/), Fig S1.1B).

503 The results are displayed in a table (Fig S1.2A, Fig S1.2B) with links to the JBrowse directly  
504 zooming on the gene  
505 ([https://urgi.versailles.inra.fr/jbrowseiwgsc/gmod\\_ibrowse/?data=myData%2FIWGSC\\_RefSe  
506 q\\_v1.0&loc=chr5A%3A30211546..30218715&tracks=DNA%2CHighConfidenceGenesv1.0%2C  
507 LowConfidenceGenesv1.0%2CrepeatRegion%2CrepeatMasker%2CDART\\_PUBLIC\\_SUMMARY  
508 &highlight=chr5A%3A30214481..30215784%20\(-%20strand\)%20\(TraesCS5A01G033100\)](https://urgi.versailles.inra.fr/jbrowseiwgsc/gmod_ibrowse/?data=myData%2FIWGSC_RefSeq_v1.0&loc=chr5A%3A30211546..30218715&tracks=DNA%2CHighConfidenceGenesv1.0%2CLowConfidenceGenesv1.0%2CrepeatRegion%2CrepeatMasker%2CDART_PUBLIC_SUMMARY&highlight=chr5A%3A30214481..30215784%20(-%20strand)%20(TraesCS5A01G033100))). He

509 explores the region around the gene and finds a marker (e.g. wPt-4131\_PURr, Fig S1.3). By  
 510 clicking on the marker, he obtains additional information stored in GnpIS-coreDB  
 511 (<https://urgi.versailles.inra.fr/GnpMap/mapping/id.do?action=MARKER&id=40393>, Fig S1.4)  
 512 showing that the marker is used in a GWAS experiments  
 513 (<https://urgi.versailles.inra.fr/association/association/viewer.do?results/markerIds=40393>,  
 514 Fig S1.5A) and is linked to a QTL (e.g. GY\_ml.8.Np\_5A,  
 515 <https://urgi.versailles.inra.fr/GnpMap/mapping/id.do?action=QTL&id=59588>, Fig S1.5B).  
 516 From the Trait description of this QTL  
 517 (<https://urgi.versailles.inra.fr/GnpMap/mapping/id.do?action=TRAIT&id=255>, Fig S1.6), he  
 518 displays all the phenotyping experiment performed on this trait  
 519 (<https://urgi.versailles.inra.fr/ephegis/ephegis/viewer.do#dataResults/traitCode=SCNO:0000>  
 520 [0002](https://urgi.versailles.inra.fr/ephegis/ephegis/viewer.do#dataResults/traitCode=SCNO:0000), Fig S1.7).  
 521 Figure S1. Printscreens of the web interfaces.

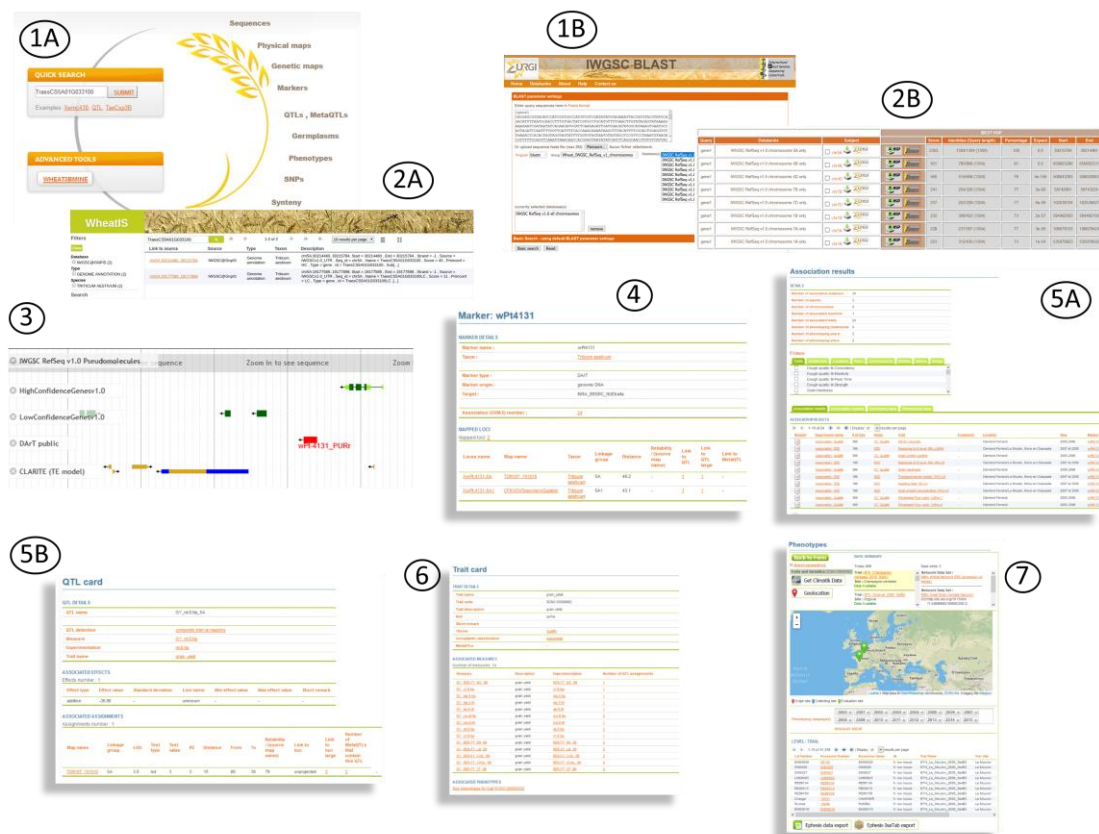

522
